# Supplementary material for: In Vivo Evidence for Inverse Agonism of Agouti-Related Peptide in the Central Nervous System of Proopiomelanocortin-Deficient Mice
Source: Oxford University Press journal article supplement (doi:10.2337/db07-0733), 2007-10-02
Supplement: db070733onlineappendix.doc [file db070733onlineappendix.doc]

**SUPPLEMENTAL INFORMATION**

**Experimental Design**

Drugs or saline were administered between 11:00 am and 12:00 pm for day-time experiments and between 6:00 and 7:00 pm (lights-off at 7:00 pm) for night-time experiments. Animals were randomized into different groups based on their 24 h food intake the day prior to the experiment and each mouse was injected with saline and drugs in a counterbalanced order (see Table 1 for number of mice in each group).

Experiment 1: Effects of MTII 0.5 nmol on food intake and body weight. Animals were matched into 2 groups, receiving either saline or MTII 0.5 nmol at the onset of the dark cycle. Allowing at least 4 days between each injection, the same protocol was repeated until each animal received each dose of drug and saline in a counterbalanced order. Food intake was measured after 2 h and 24 h and body weights were recorded after 24h.

Experiment 2: Feeding effects of co-administration of AgRP and MTII. Animals were matched into 4 groups and on 4 different experimental days the mice were injected with either saline, MTII 0.1 nmol, AgRP 0.5 nmol or MTII 0.1 nmol + AgRP 0.5 nmol at the onset of the dark period, so that each animal received the 4 different treatments in a counterbalanced order. Food intake was measured after 2 h and 24 h.

Experiments 3 and 4: Short-term feeding effects of AgRP 0.5 nmol or ghrelin 1 nmol. Using the same experimental design as experiment 1, animals received either saline or ghrelin 1 nmol during the light cycle. Food intake was measured after 2 h.

Experiment 5: Short and long-term effects of AgRP on food intake and body weight. A first set of mice including *Pomc+/+Tg/+* and *Pomc-/-Tg/+* mice were injected with saline or AgRP 0.5 nmol then saline or AgRP 2 nmol during the light period on 4 different experimental days. Due to the long-term orexigenic effects of AgRP, injections were separated by at least 8 days. In subsequent sets of experiments, only the lowest dose of AgRP with long-term orexigenic (0.5 nmol) effects in control mice was used. In a second set of mice including all 4 genotypes (*Pomc+/+Tg/+*, *Pomc-/-*, *Pomc+/-*and *Pomc-/-Tg/+*), saline or AgRP 0.5 nmol was injected at the onset of the dark cycle on 2 different experimental days. Food was measured after 2h and every 24 h during 4 consecutive days in both sets of experiments.

Experiment 6: Long-term effects of AgRP on body weight, food intake, VO2 and RER. *Pomc+/+Tg/+* and *Pomc-/-Tg/+* mice were housed in chambers for measurement of O2 consumption during 3 days for habituation to the procedure. All mice were injected with saline at the onset of the dark cycle on Day 3 and body weights, food intake, VO2 and RER were recorded. On Day 5, mice were randomized into 2 groups based on their food intake and VO2 values after saline injection and received either saline or AgRP 0.5 nmol at the onset of the dark cycle. The different parameters were followed for 7 consecutive days. On Day 12, the same protocol was repeated: all mice were injected with saline at the onset of the dark cycle and on Day 14, mice were injected again with saline or AgRP at the onset of the dark cycle, so that each animal had received the 2 different treatments in a counterbalanced order.

Table 1. Number of mice used in each experiment.

|  | *Pomc+/+Tg/+* | *Pomc-/-Tg/+* | *Pomc-/-* | *Pomc+/-* |
| --- | --- | --- | --- | --- |
| Experiment 1 | n=10 | n=7 | n=7 | N.A |
| Experiment 2 | n=14 | n=3 | n=9 | n=7 |
| Experiment 3 (AgRP) | n=6 | n=9 | N.A | N.A |
| Experiment 4 (Ghrelin) | n=11 | n=13 | n=6 | N.A |
| Experiment 5 | n=8 | n=5 | n=7 | n=6 |
| Experiment 6 | n=8 | n=7 | N.A | N.A |

N.A., not applicable.
